# Supplementary material for: Dual-signalled magneto-optical barcodes with lanthanide-based molecular cluster-aggregates
Source: Royal Society of Chemistry journal article supplement (doi:10.1039/d3nr03838f), 2023-01-01
Supplement: d3nr03838f1.pdf [file d3nr03838f1.pdf]

Electronic Supporting Information

**Dual-signalled magneto-optical barcodes with lanthanide-based  
molecular cluster-aggregates**

Diogo Alves Gálico,<sup>a</sup> and Muralee Murugesu<sup>a\*</sup>

<sup>a</sup>Department of Chemistry and Biomolecular Sciences, University of Ottawa, Ottawa, Ontario

K1N 6N5, Canada.

Email: m.murugesu@uottawa.ca

## Experimental Section

**Synthesis of  $\{[\text{Ln}_6(\text{teaH})_6(\text{NO}_3)_6]\}$ :** The synthetic procedure follows the previously reported synthesis.<sup>S1</sup>  $\text{Ho}(\text{NO}_3)_3 \cdot 6\text{H}_2\text{O}$  (0.6 mmol) was dissolved in  $\text{MeOH}/\text{CH}_2\text{Cl}_2$  (5 mL : 15 mL), followed by the addition of triethanolamine (1.2 mmol) and triethylamine (4.8 mmol). After a few minutes, the reaction mixture resulted in a clear pink solution. This solution was stirred for four hours. During this time, a small amount of precipitate formed. The solution was filtered and layered with  $\text{Et}_2\text{O}$ . After two days, yellow crystals of  $[\text{Ho}_6(\text{teaH})_6(\text{NO}_3)_6]$  appeared in an approximate yield of 58 % (crystalline product).

For  $\{\text{Er}_6\}$ , the same procedure was followed using 0.6 mmol of  $\text{Er}(\text{NO}_3)_3 \cdot 6\text{H}_2\text{O}$ . Yield = 62 % (pink crystalline product).

For  $\{\text{Ho}_3\text{Er}_3\}$ , the same procedure was followed using 0.3 mmol of  $\text{Ho}(\text{NO}_3)_3 \cdot 6\text{H}_2\text{O}$  and 0.3 mmol of  $\text{Er}(\text{NO}_3)_3 \cdot 6\text{H}_2\text{O}$ . Yield = 56 % (orange crystalline product).

### Characterisation:

FTIR spectra were obtained in a Nicolet 6700 FT-IR Spectrometer (Thermo Scientific).

PXRD diffractograms were obtained in a Rigaku Ultima IV Diffractometer using  $\text{Cu K}\alpha$  filtered radiation ( $\lambda = 1.5401 \text{ \AA}$ ).

ICP analysis was performed in a 5110 ICP-OES Instrument (Agilent).

MCD measurements were performed on a Jasco J-1700 CD spectrometer and an Oxford SpectromagPT cryogen-free magneto-optical superconducting magnet system as depicted in Scheme S1. All the spectra were obtained in the 300 – 850 nm range, with three accumulations, a bandwidth of 2 nm, and a scan speed of 1000 nm/min. The samples were prepared as a  $0.1 \text{ mg mL}^{-1}$  aqueous solution.

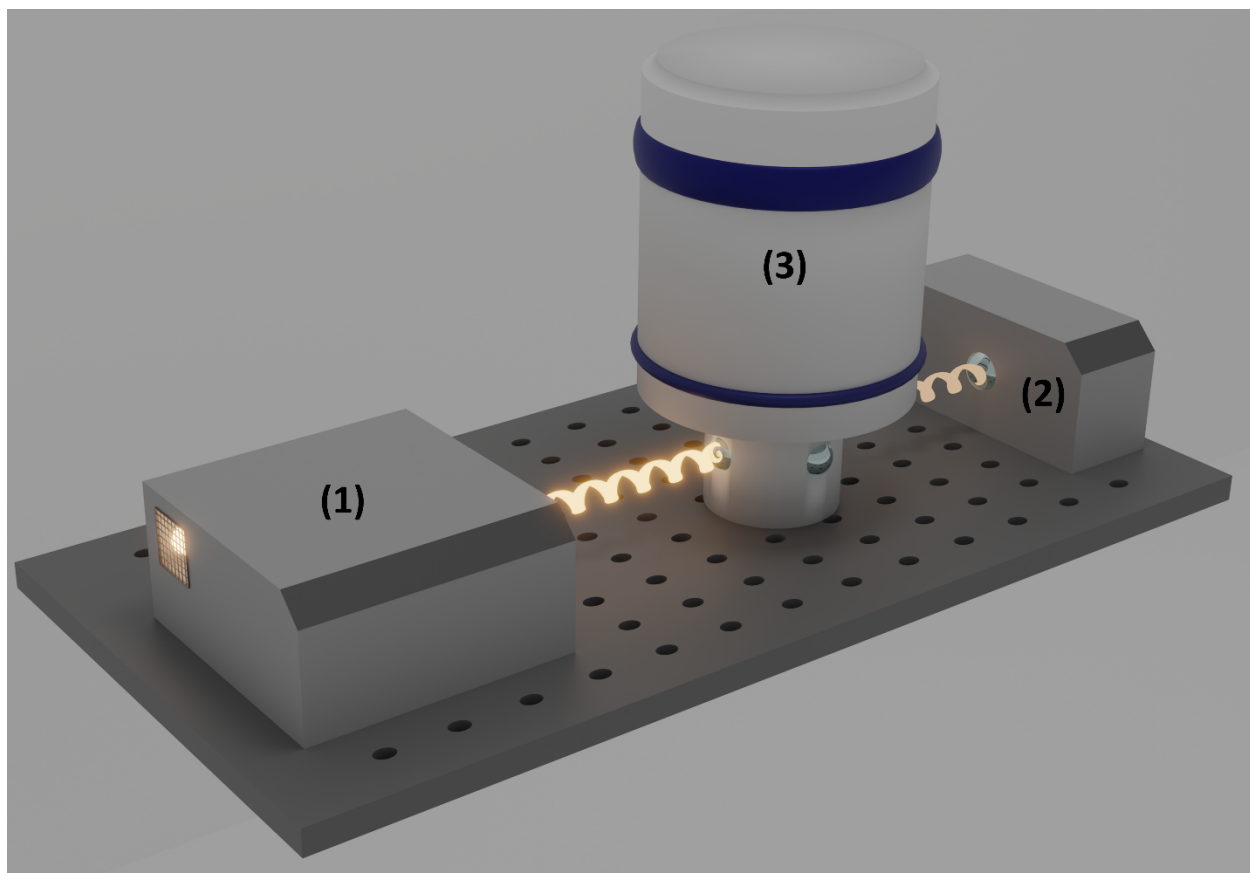

**Scheme S1:** Schematic representation of the experimental setup. The unpolarized light from a Xe lamp is circularly polarized inside the Jasco J-1700 CD spectrometer **(1)** monochromator and reaches the **(2)** detector after interacting with the sample. The sample is placed in a 1 cm optical path quartz cuvette and placed inside the **(3)** Oxford SpectromagPT cryogen-free magneto-optical superconducting magnet system.

## Figures and Tables

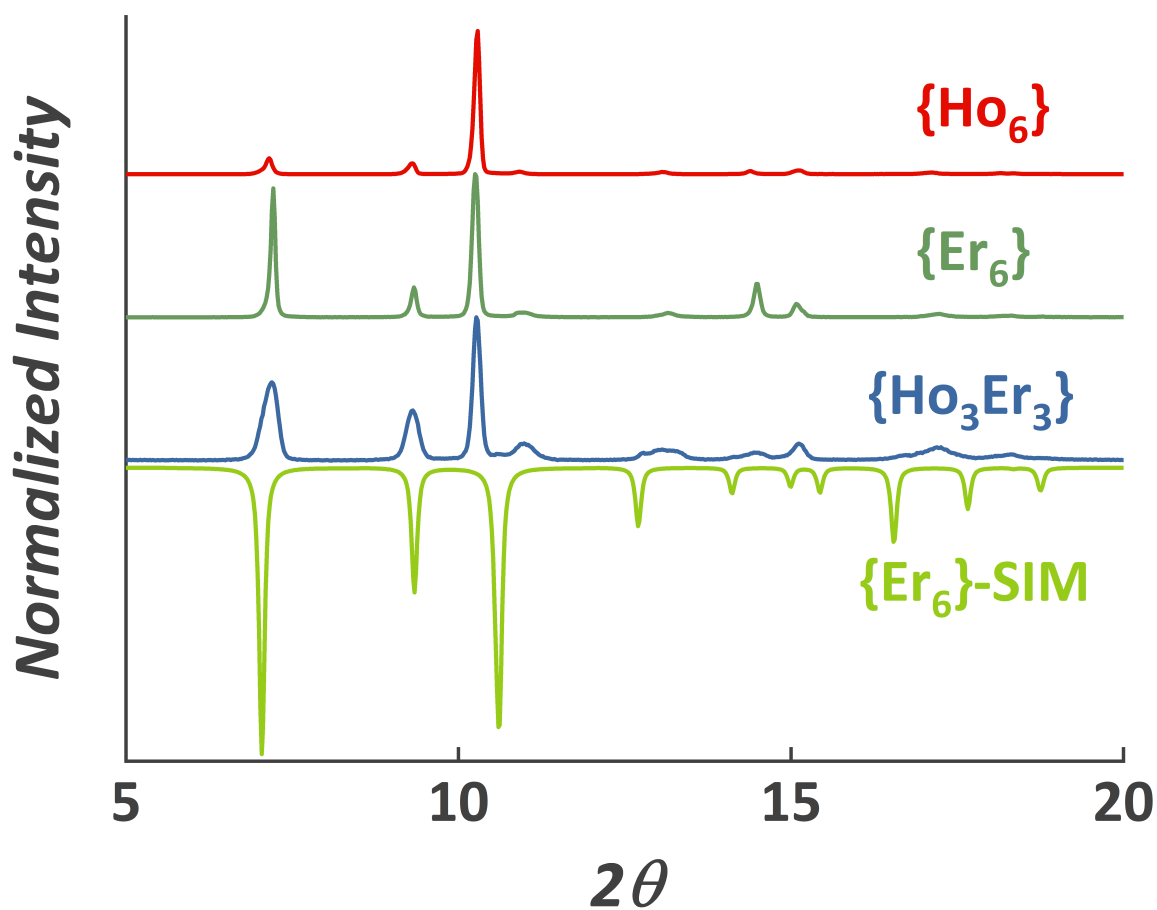

**Figure S1:** Experimental PXRD diffractograms for **{Ho<sub>6</sub>}**, **{Er<sub>6</sub>}**, and **{Ho<sub>3</sub>Er<sub>3</sub>}** MCAs compared with the simulated for **{Er<sub>6</sub>}** (CCDC number: 1876163).

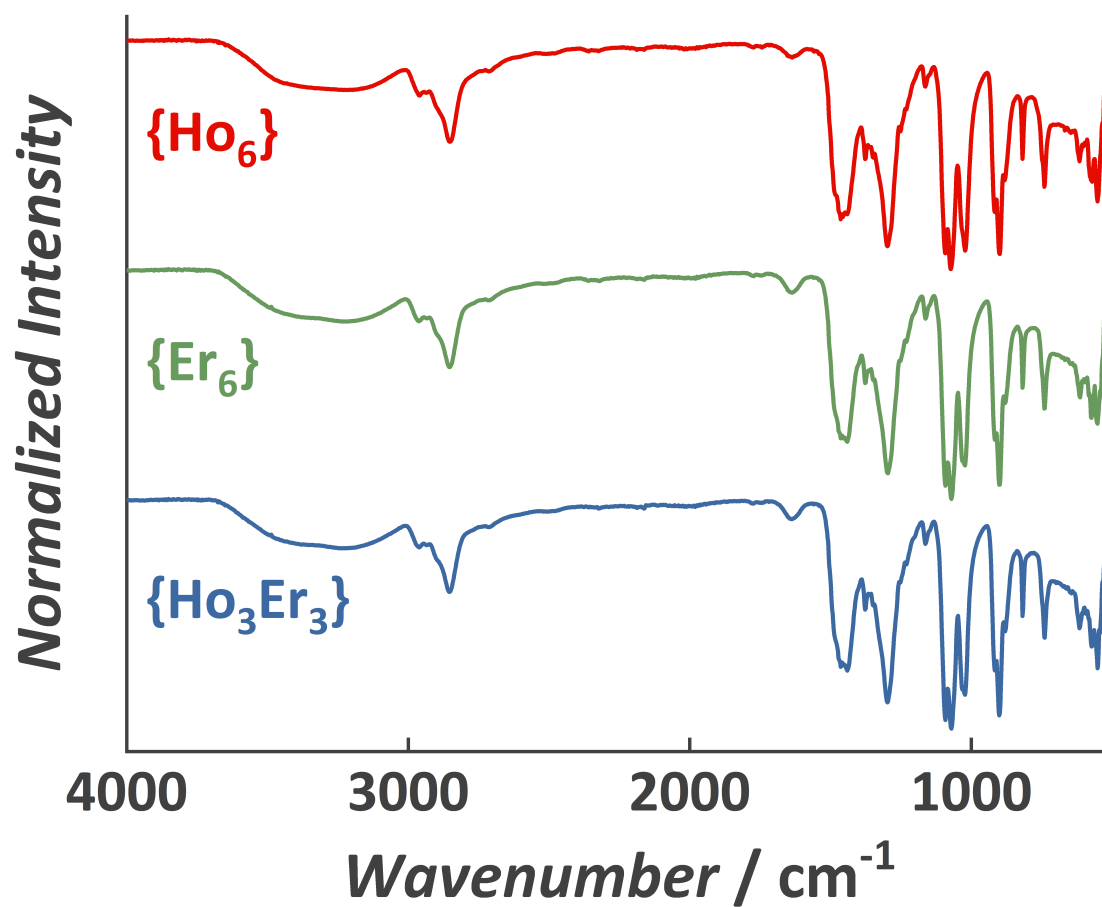

Figure S2: FTIR spectra for {Ho<sub>6</sub>}, {Er<sub>6</sub>}, and {Ho<sub>3</sub>Er<sub>3</sub>} MCAs.

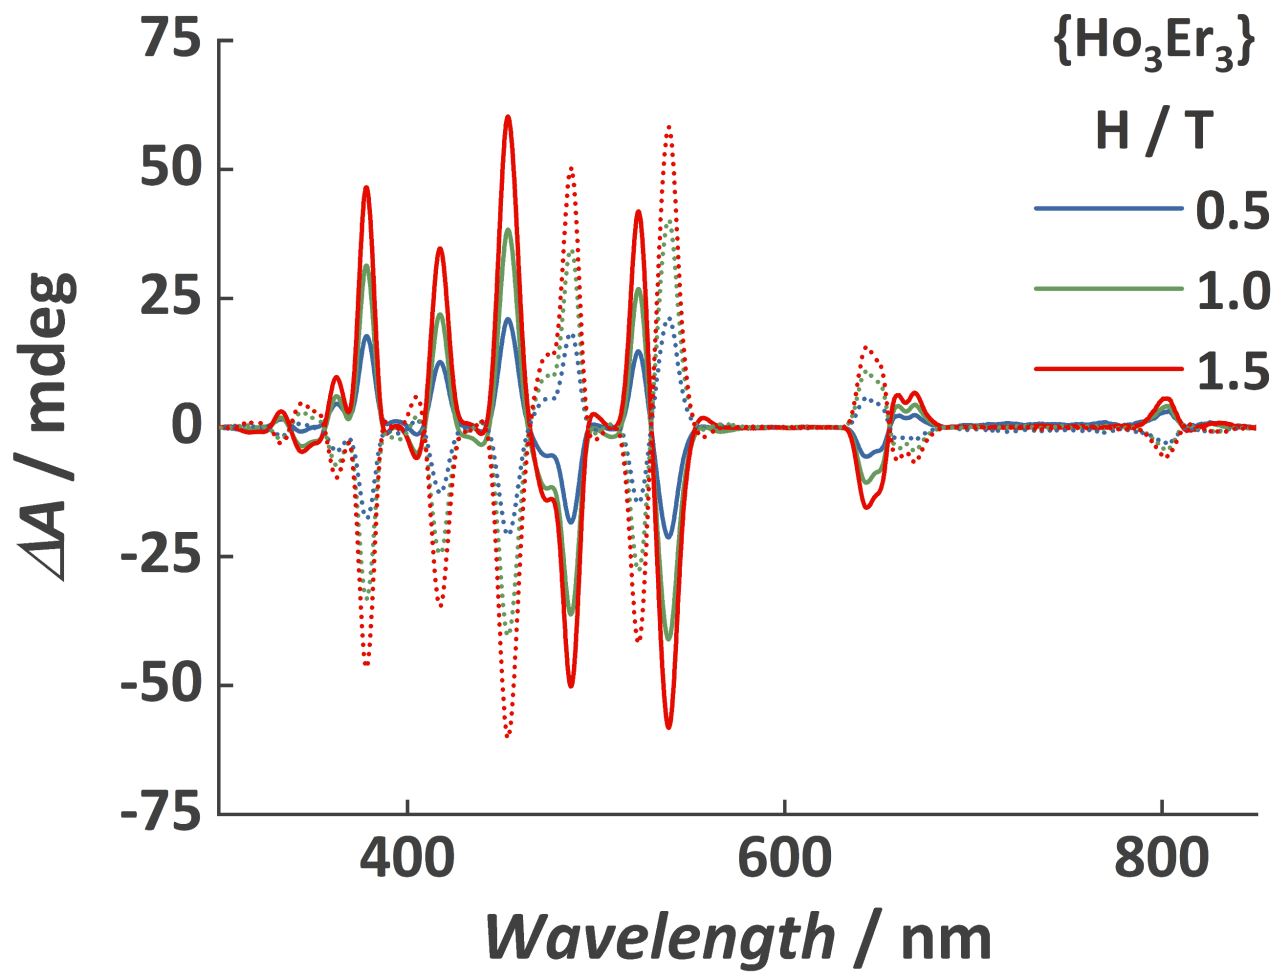

**Figure S3:** MCD spectra for {Ho<sub>3</sub>Er<sub>3</sub>} MCA obtained at 25 °C and under different applied magnetic fields. Dotted spectra refer to  $H = -0.5, -1.0,$  and  $-1.5$  T magnetic fields.

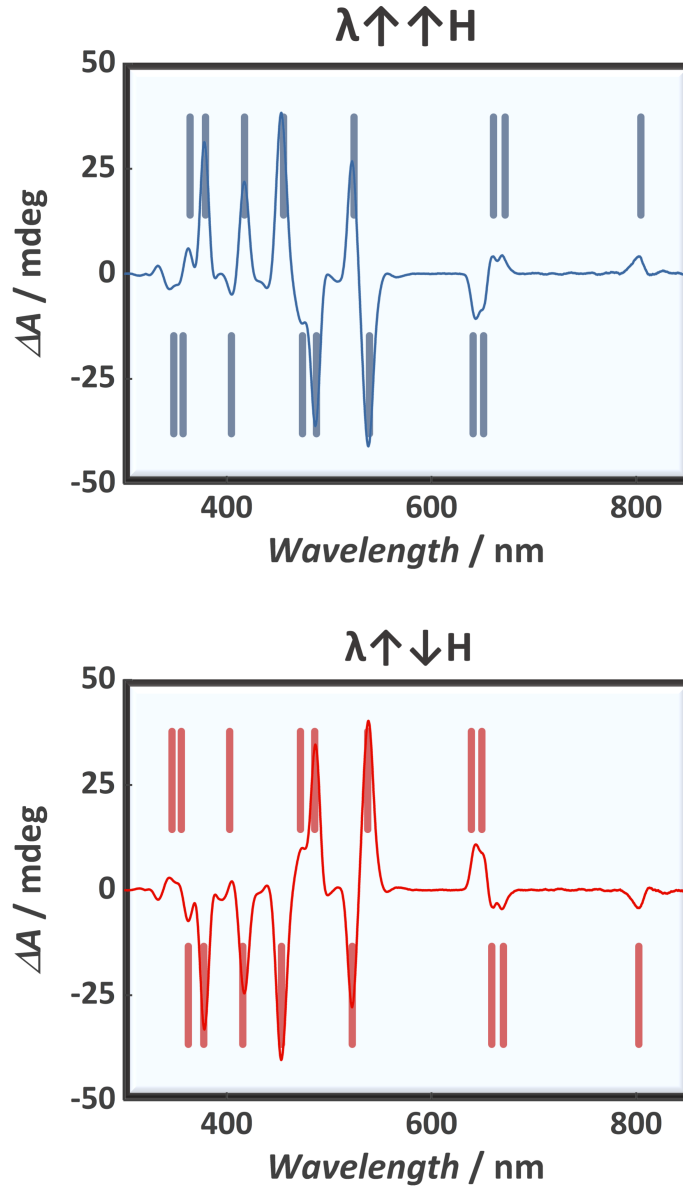

**Figure S4:** Overlay between the MCD spectrum and the magneto-optical barcode read-out for  $\{\text{Ho}_3\text{Er}_3\}$  MCA with an applied magnetic field of (top) 1.0 T and (bottom) -1.0 T. This figure demonstrates the extra security feature attained in magneto-optical barcodes; the mirror-image obtained when reversing the magnetic field.

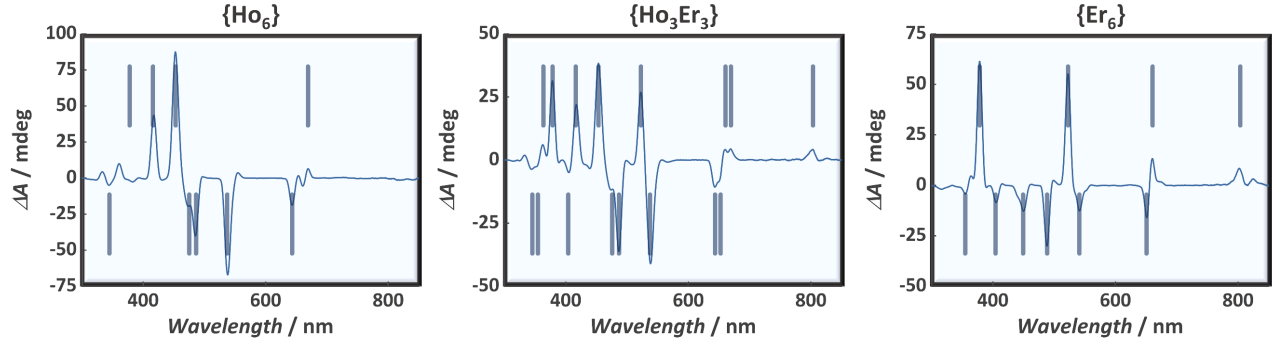

**Figure S5:** Comparison between the magneto-optical barcode read-out for **{Ho<sub>6</sub>}**, **{Er<sub>6</sub>}**, and **{Ho<sub>3</sub>Er<sub>3</sub>}** MCAs with an applied magnetic field of 1.0 T. This figure evidence the highest spectral complexity for the heterometallic MCA magneto-optical barcode.

**Table S1:** Energy levels of Ho<sup>III</sup> and Er<sup>III</sup>. Energies obtained from Carnall.<sup>S2</sup>

| Ho <sup>III</sup>             |                                                                                             | Er <sup>III</sup>             |                                                                                                     |
|-------------------------------|---------------------------------------------------------------------------------------------|-------------------------------|-----------------------------------------------------------------------------------------------------|
| Wavenumber / cm <sup>-1</sup> | Assignment                                                                                  | Wavenumber / cm <sup>-1</sup> | Assignment                                                                                          |
| 30799                         | <sup>5</sup> G <sub>2</sub> ← <sup>5</sup> I <sub>8</sub>                                   | 33319                         | <sup>2</sup> P <sub>1/2</sub> ← <sup>4</sup> I <sub>15/2</sub>                                      |
| 29947                         | ( <sup>3</sup> F <sub>4</sub> , <sup>3</sup> K <sub>6</sub> ) ← <sup>5</sup> I <sub>8</sub> | 28224                         | ( <sup>2</sup> K <sub>15/2</sub> , <sup>4</sup> G <sub>7/2</sub> ) ← <sup>4</sup> I <sub>15/2</sub> |
| 28875                         | ( <sup>5</sup> G <sub>3</sub> , <sup>3</sup> L <sub>9</sub> ) ← <sup>5</sup> I <sub>8</sub> | 27637                         | <sup>4</sup> G <sub>9/2</sub> ← <sup>4</sup> I <sub>15/2</sub>                                      |
| 27678                         | ( <sup>5</sup> G <sub>5</sub> , <sup>3</sup> H <sub>6</sub> ) ← <sup>5</sup> I <sub>8</sub> | 26631                         | <sup>4</sup> G <sub>11/2</sub> ← <sup>4</sup> I <sub>15/2</sub>                                     |
| 26058                         | <sup>3</sup> K <sub>7</sub> ← <sup>5</sup> I <sub>8</sub>                                   | 24756                         | <sup>2</sup> H <sub>9/2</sub> ← <sup>4</sup> I <sub>15/2</sub>                                      |
| 25859                         | <sup>5</sup> G <sub>4</sub> ← <sup>5</sup> I <sub>8</sub>                                   | 22712                         | <sup>4</sup> F <sub>3/2</sub> ← <sup>4</sup> I <sub>15/2</sub>                                      |
| 23987                         | <sup>5</sup> G <sub>5</sub> ← <sup>5</sup> I <sub>8</sub>                                   | 22376                         | <sup>4</sup> F <sub>5/2</sub> ← <sup>4</sup> I <sub>15/2</sub>                                      |
| 22179                         | <sup>5</sup> G <sub>6</sub> ← <sup>5</sup> I <sub>8</sub>                                   | 20715                         | <sup>4</sup> F <sub>7/2</sub> ← <sup>4</sup> I <sub>15/2</sub>                                      |
| 21267                         | <sup>3</sup> K <sub>8</sub> ← <sup>5</sup> I <sub>8</sub>                                   | 19337                         | ( <sup>2</sup> H <sub>11/2</sub> , <sup>4</sup> S <sub>3/2</sub> ) ← <sup>4</sup> I <sub>15/2</sub> |
| 21039                         | <sup>5</sup> F <sub>2</sub> ← <sup>5</sup> I <sub>8</sub>                                   | 15455                         | <sup>4</sup> F <sub>9/2</sub> ← <sup>4</sup> I <sub>15/2</sub>                                      |
| 20594                         | <sup>5</sup> F <sub>3</sub> ← <sup>5</sup> I <sub>8</sub>                                   | 12597                         | <sup>4</sup> I <sub>9/2</sub> ← <sup>4</sup> I <sub>15/2</sub>                                      |
| 18538                         | <sup>5</sup> F <sub>4</sub> ← <sup>5</sup> I <sub>8</sub>                                   | -                             | -                                                                                                   |
| 18381                         | <sup>5</sup> S <sub>2</sub> ← <sup>5</sup> I <sub>8</sub>                                   | -                             | -                                                                                                   |
| 15456                         | <sup>5</sup> F <sub>5</sub> ← <sup>5</sup> I <sub>8</sub>                                   | -                             | -                                                                                                   |
| 13212                         | <sup>5</sup> I <sub>4</sub> ← <sup>5</sup> I <sub>8</sub>                                   | -                             | -                                                                                                   |



## References

[1] D. A. Gállico, J. S. Ovens and M. Murugesu, *Nanoscale*, 2020, **12**, 11435—11439.

[2] W. T. Carnall, H. Crosswhite and H. M. Crosswhite, *Energy level structure and transition probabilities in the spectra of the trivalent lanthanides in LaF<sub>3</sub>*, Argonne Nat. Lab. 78-XX-95 Rep., 1977
